# Supplementary material
Source: publisher figshare collection journal article supplement (https://frontiersin.figshare.com/ndownloader/files/22534331)

**A**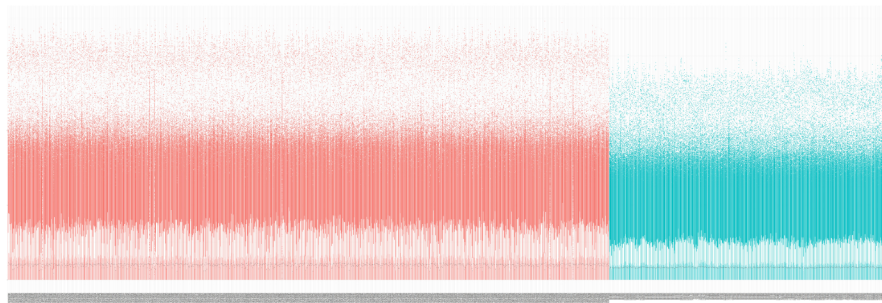**B**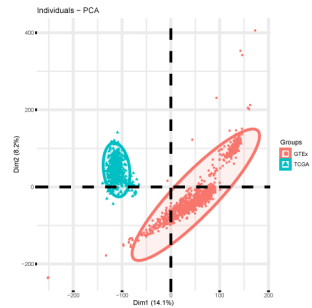**C**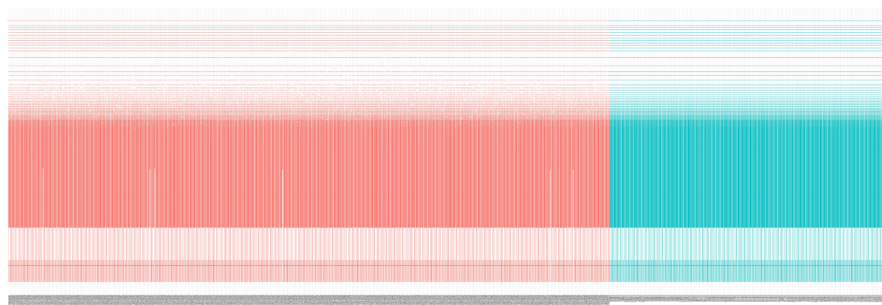**D**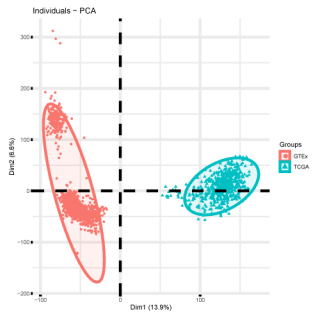

Supplement: Supplementary file [file 22534331]
